# Supplementary material for: Development and application of effective pairwise potentials for UO2n+, NpO2n+, PuO2n+, and AmO2n+ (n = 1, 2) ions with water
Source: Royal Society of Chemistry journal article supplement (doi:10.1039/c3cp52444b), 2013-01-01
Supplement: c3cp52444b.pdf [file c3cp52444b.pdf]

## ELECTRONIC SUPPLEMENTARY INFORMATION

Development and Application of Effective Pairwise Potentials for  $\text{UO}_2^{n+}$ ,  $\text{NpO}_2^{n+}$ ,  $\text{PuO}_2^{n+}$ , and  $\text{AmO}_2^{n+}$  ( $n = 1, 2$ ) Ions with WaterVladimir Pomogaev,<sup>a</sup> Surya Prakash Tiwari,<sup>a</sup> Neeraj Rai,<sup>a</sup> George Goff,<sup>b</sup> William F. Schneider<sup>\*c</sup> and Edward J. Maginn,<sup>\*d</sup>

Received Xth XXXXXXXXXX 20XX, Accepted Xth XXXXXXXXXX 20XX

First published on the web Xth XXXXXXXXXX 200X

DOI: 10.1039/b000000x

**Table 1** Non-bonded LJ interaction parameters for  $\text{AnO}_2^{n+}$  – water interactions. LJ parameters for SPC/Fw, TIP3P, TIP4P, and TIP5P water models are taken from previous work by Rai et al.<sup>1</sup>.

|                                     | SPC/Fw | SPC/E | TIP3P | TIP4P | TIP5P |
|-------------------------------------|--------|-------|-------|-------|-------|
| $\sigma_{\text{An-Ow}}$ (nm)        | 0.325  | 0.306 | 0.325 | 0.278 | 0.326 |
| $\epsilon_{\text{An-Ow}}$ (kJ/mol)  | 0.270  | 0.587 | 0.270 | 1.390 | 0.260 |
| $\sigma_{\text{OAn-Ow}}$ (nm)       | 0.300  | 0.350 | 0.300 | 0.307 | 0.292 |
| $\epsilon_{\text{OAn-Ow}}$ (kJ/mol) | 1.080  | 0.192 | 1.080 | 0.850 | 1.470 |

**Table 2** Mean squared error (MSE) to see the quality of fitting of LJ+Coulombic functional form for  $\text{AnO}_2^{n+}$ -SPC/E water interactions to ab-initio PES

| $\text{AnO}_2^{n+}$ | $\text{UO}_2^{2+}$ | $\text{NpO}_2^{2+}$ | $\text{PuO}_2^{2+}$ | $\text{AmO}_2^{2+}$ | $\text{UO}_2^+$ | $\text{NpO}_2^+$ | $\text{PuO}_2^+$ | $\text{AmO}_2^+$ |
|---------------------|--------------------|---------------------|---------------------|---------------------|-----------------|------------------|------------------|------------------|
| MSE                 | 25.6               | 22.4                | 27.3                | 31.0                | 33.1            | 34.3             | 30.2             | 28.3             |

To account for the effect of simulation box size on the hydration free energy, hydration free energies of the same ion ( $\text{UO}_2^{2+}$ ) in the same water model (SPC/E) were calculated in 5 different box sizes as plotted in Fig. 1. From the plot, we see that the hydration free energy gets almost independent at large box sizes. Since we used 3.12 nm box size to calculate hydration free energies in the main paper, thus we added -2.2 kJ/mol to the calculated hydration free energies to make them box size independent. Note that the effect of box size on the final value of hydration free energy was only studied for dication in SPC/E water. We assumed that a similar trend will follow for other ions and in other water models, and the same correction of -2.2 kJ/mol was employed in all the values of hydration free energies calculated in cubic box length of 3.12 nm for the dications. A similar procedure was used to obtain a correction of -1 kJ/mol to be added to the hydration free energies for monocations.

<sup>a</sup> Department of Chemical and Biomolecular Engineering, University of Notre Dame, 182 Fitzpatrick Hall, Notre Dame, IN 46556, USA.<sup>b</sup> Los Alamos National Laboratory, New Mexico 87545, USA.<sup>c</sup> Department of Chemical and Biomolecular Engineering, University of Notre Dame, 182 Fitzpatrick Hall, Notre Dame, IN 46556, USA. Fax: 01 574 631 8366; Tel: 01 574 631 8754; E-mail: wschneider@nd.edu<sup>d</sup> Department of Chemical and Biomolecular Engineering, University of Notre Dame, 182 Fitzpatrick Hall, Notre Dame, IN 46556, USA. Fax: 01 574 631 8366; Tel: 01 574 631 5687; E-mail: ed@nd.edu

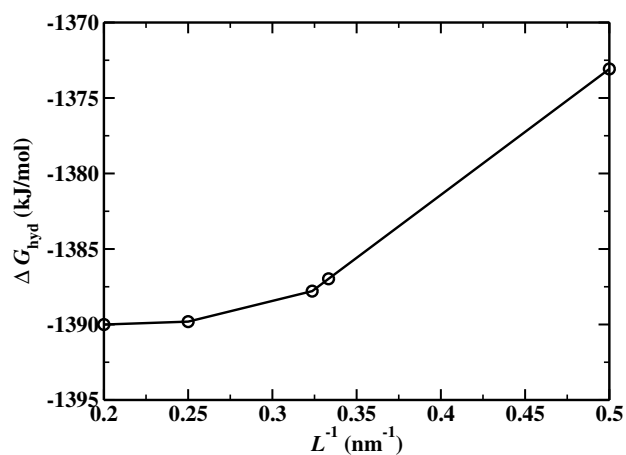

**Fig. 1** Effect of cubic box length ( $L$ ) used on  $\Delta G_{\text{hyd}}$  of  $\text{UO}_2^{2+}$  in SPC/E water using MD simulations.

## References

- 1 N. Rai, S. P. Tiwari and E. J. Maginn, *J. Phys. Chem. B*, 2012, **116**, 10885–97.
