# Supplementary material for: Development and application of effective pairwise potentials for UO2n+, NpO2n+, PuO2n+, and AmO2n+ (n = 1, 2) ions with water
Source: Royal Society of Chemistry journal article supplement (doi:10.1039/c3cp52444b), 2013-01-01
Supplement: c3cp52444b_2.pdf [file c3cp52444b_2.pdf]

## Sample Input Files for MD Simulations Using Gromacs:

### 1. Topology File:

```
[ defaults ]
; nbfunc  comb-rule gen-pairs fudgeLJ      fudgeQQ
1          2          no          1          1
;nbfunc=1 for LJ; 2 for LB rule and 3 for geometric mixing rule.

[ atomtypes ]
; name  at_no  mass      charge  ptype  sigma  epsilon ;SPC/E
U       92     238.0289  2.5     A      0.295  0.530
Ou      8      15.99940  -0.25   A      0.383  0.057
Ow      8      15.99940  -0.8476 A      3.165492e-01 0.650299455
Hw      1      1.00800   0.4238  A      0      0

[ nonbond_params ]
; i  j      func sigma(c6)      eps(c12) ;SPC/E water model
U   Ow  1     0.306      0.587
U   Hw  1     0          0
Ou  Ow  1     0.350      0.192
Ou  Hw  1     0          0

[ moleculetype ]
; molname nrexcl
ION      2

[ atoms ]
; id at type      res nr      residu name      at name  cg nr charge
1     Ou      1     UO2      Ou1  1     -0.25
2     U       1     UO2      U    1     2.5
3     Ou      1     UO2      Ou2  1     -0.25

[ bonds ]
; i  j      funct  length  force.c.
1   2      1      0.1761  622300.0 ; By Vlad, from B3LYP
2   3      1      0.1761  622300.0

[ angles ]
```

```
; i      j      k      funct      angle      force.c.  
1        2        3        1          180.000    198 ; By Vlad, from B3LYP
```

```
[ moleculetype ]  
; molname nrexcl  
SOL      2
```

```
[ atoms ]  
; nr      type  resnr residue  atom      cgnr      charge      mass  
#ifndef HEAVY_H  
    1      Ow    1     SOL     OW        1      -0.8476    15.99940  
    2      Hw    1     SOL     HW1       1       0.4238     1.00800  
    3      Hw    1     SOL     HW2       1       0.4238     1.00800  
#else  
    1      Ow    1     SOL     OW        1      -0.8476     9.95140  
    2      Hw    1     SOL     HW1       1       0.4238     4.03200  
    3      Hw    1     SOL     HW2       1       0.4238     4.03200  
#endif
```

```
#ifndef FLEXIBLE  
[ settles ]  
; OW funct      doh  dhh  
1  1  0.1  0.16330
```

```
[ exclusions ]  
1  2  3  
2  1  3  
3  1  2  
#else  
[ bonds ]  
; i j      funct      length      force.c.  
1  2  1  0.1  345000    0.1      345000  
1  3  1  0.1  345000    0.1      345000
```

```
[ angles ]  
; i j      k      funct      angle      force.c.  
2  1  3  1  109.47    383  109.47    383  
#endif
```

```
[ system ]  
Uranyl ion in water
```

```
[ molecules ]  
ION          1  
SOL          1000
```

## 2. Partial initial sample .gro file:

```
Uranyl ion in water  
3003
```

```
1ION   Ou1   1   1.250   1.250   1.426  
1ION   U     2   1.250   1.250   1.250  
1ION   Ou2   3   1.250   1.250   1.074  
2SOL   OW    4   0.569   1.275   1.165  
2SOL   HW1   5   0.476   1.268   1.128  
2SOL   HW2   6   0.580   1.364   1.209  
3SOL   OW    7   1.555   1.511   0.703  
3SOL   HW1   8   1.498   1.495   0.784  
3SOL   HW2   9   1.496   1.521   0.623  
4SOL   OW   10   1.743   0.618   0.856  
4SOL   HW1  11   1.776   0.712   0.856  
4SOL   HW2  12   1.794   0.564   0.922  
5SOL   OW   13   1.135   0.703   0.717  
5SOL   HW1  14   1.192   0.781   0.692  
5SOL   HW2  15   1.075   0.729   0.793
```

```
.  
  . (used genbox (included in Gromacs package) command to solvate the simulation box)
```

```
.  
999SOL   OW 2995   2.945   2.846   1.949  
999SOL   HW1 2996   2.922   2.899   1.867  
999SOL   HW2 2997   3.026   2.790   1.930  
1000SOL   OW 2998   1.941   3.102   2.515  
1000SOL   HW1 2999   1.940   3.055   2.603  
1000SOL   HW2 3000   2.023   3.074   2.464  
1001SOL   OW 3001   2.290   2.286   2.382  
1001SOL   HW1 3002   2.320   2.214   2.320  
1001SOL   HW2 3003   2.251   2.246   2.465  
3.12000   3.12000   3.12000
```

**3. MDP file for production run, for properties calculations other than hydration free energy** (we are not including files for initial energy minimization and equilibration, as they will be trivial for reproducing our results):

```
integrator = md
dt = 0.002
tinit = 0
nsteps = 75000000
nstcomm = 10
pbc = xyz

constraint_algorithm = lincs
continuation = yes
nstxout = 0
nstvout = 50000
nstfout = 0
nstlog = 5000
nstenergy = 5000
nstxtcout = 20
;Such small frequency of saving trajectories is not necessary to
;reproduce results in this paper.
xtc-precision = 1000
nstlist = 5
ns_type = grid
rlist = 1.48
coulombtype = PME_switch
rcoulomb_switch = 1.1
rcoulomb = 1.2
vdw-type = switch
rvdw-switch = 1.1
rvdw = 1.2
lincs_order = 9
DispCorr = EnerPres ; account for cut-off vdW scheme

; PME electrostatics parameters
fourierspacing = 0.12
fourier_nx = 0
fourier_ny = 0
fourier_nz = 0
pme_order = 6
ewald_rtol = 1e-6
```

```
optimize_fft      = yes

tcoupl           = nose-hoover
tc-grps          = System
tau_t            = 6                ; time constant, in ps
ref_t            = 298.15

pcoupl           = no
gen_vel          = no
```

#### 4. For hydration free energy calculations.

Sample MDP file for production run (we are not including files for initial energy minimization and equilibration, as they will be trivial for reproducing our results):

Note: We used different MDP files for hydration free energy calculations of one ion. First, the ion was in totally decoupled state with water solvents, then it was made coupled from none to van der Waals coupled state (by changing `init_lambda` from 0 to 1). After this, ion was coupled from van der Waals coupled state to a fully coupled state: VDW+electrostatic interactions (again, by changing `init_lambda` from 0 to 1). `g_bar`, included in Gromacs package, was used twice to calculate the free energies of the two processes. The two numbers were added to get the final hydration free energies.

We used `init_lambda` as {0, 0.05, 0.10, ... , 0.95, 1.0}, and correspondingly varied `foreign_lambda`. For e.g., for `init_lambda` = 0.4, `foreign_lambda` = 0.35 0.45 was used; for `init_lambda` = 0.7, `foreign_lambda` = 0.65 0.75 was used; and so on. For `init_lambda` = 0.0, `foreign_lambda` = 0.05 was used; for `init_lambda` = 1, `foreign_lambda` = 0.95 was used.

Sample MDP file for changing from no interaction to only VDW interactions between ion and water molecules:

```
integrator        = sd                ; Langevin dynamics
tinit            = 0
dt               = 0.002
nsteps           = 1000000
comm_mode        = Linear
nstcomm          = 10
lincs_order      = 9

nstxout          = 10000
nstvout          = 20000
```

```
nstfout           = 20000
nstlog           = 2000
nstenergy        = 2000
nstxtcout        = 0
xtc-precision    = 1000

nstlist          = 5 ;default: 10
ns_type          = grid
pbc              = xyz

rlist            = 1.45
coulombtype      = PME-Switch
rcoulomb         = 1.2
rcoulomb-switch  = 1.1
vdw-type         = switch
rvdw            = 1.2
rvdw-switch      = 1.1

DispCorr         = EnerPres
; Spacing for the PME/PPPM FFT grid
fourierspacing   = 0.12
pme_order        = 6
ewald_rtol       = 1e-06
epsilon_surface  = 0
ewald_geometry   = 3d
optimize_fft     = yes

; tcoupl is implicitly handled by the sd integrator
tc_grps          = system
tau_t            = 2.0
ref_t            = 298.15

Pcoupl          = Parrinello-Rahman
tau_p            = 2
compressibility   = 4.5e-05
ref_p            = 1

gen_vel          = no
continuation     = yes

; Sample input for free energy control, from no interaction to VDW
```

```
interactions.  
free_energy           = yes  
init_lambda           = 0.30 ;change this from 0 to 1  
delta_lambda          = 0  
foreign_lambda        = 0.25 0.35 ;change this according to init_lambda  
sc-alpha              = 0.5  
sc-power              = 1.0  
sc-sigma              = 0.3  
couple-moltype        = ION ; name of moleculetype to decouple  
couple-lambda0         = none ; no interaction between ION and SOLs  
couple-lambda1         = vdw ; only vdw interaction  
couple-intramol       = no  
nstdhdl               = 100
```

Part of sample MDP file for changing VDW only interaction to full (VDW+electrostatic) interactions between ion and water molecules:

```
;Copy rest of the missing part from above file.  
;Sample input for free energy control, from VDW only interaction to  
full (VDW+electrostatic) interactions:  
free_energy           = yes  
init_lambda           = 0.85 ;change this from 0 to 1  
delta_lambda          = 0  
foreign_lambda        = 0.80 0.90 ;change this according to init_lambda  
sc-alpha              = 0.0  
sc-power              = 1.0  
sc-sigma              = 0.0  
couple-moltype        = ION ; name of moleculetype to decouple  
couple-lambda0         = vdw ; vdw interactions  
couple-lambda1         = vdw-q ; vdw and charge interactions  
couple-intramol       = no  
nstdhdl               = 100
```
